# Supplementary material for: Nano-(V1/2Sb1/2Sn)O4: a high capacity, high rate anode material for Li-ion batteries
Source: Royal Society of Chemistry journal article supplement (doi:10.1039/c0jm04140h), 2011-01-01
Supplement: c0jm04140h.pdf [file c0jm04140h.pdf]

**Supplementary information Fig. S1:** Ex situ XRD patterns of the  $M-(V_{1/2}Sb_{1/2}Sn)O_4$  cycled (1<sup>st</sup> cycle) electrodes in the discharged state at (a) 1.0 V, (b) 0.7 V and (c) 0.005 V and (d) in the charged state at 1.0 V. CuK $\alpha$  radiation. # Lines due to the Cu-foil current collector, \* the parent compound (hkl) lines are indexed in (a).

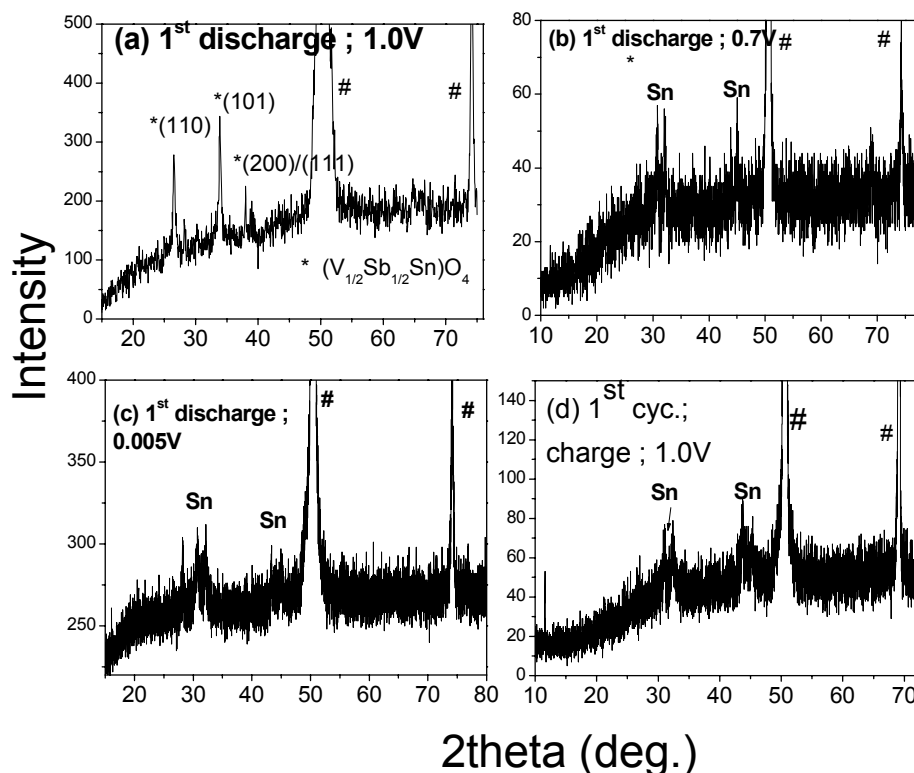

As can be seen, Fig. S1a shows the lines due to the parent compound along with lines due to the Cu-foil substrate. In the discharged-state at 0.7 V (Fig. S1b), lines due to Sn-metal (regions of  $2\theta = 30-33^\circ$  and  $43-45^\circ$  are seen). The XRD pattern at 0.005 V (Fig. S1c) shows only broad low-intensity lines due to Sn-metal and lines due to Li-Sn alloy ( $2\theta = 20-25^\circ$ ). Lines of Li-Sb alloy or Sb-metal are not observed. This could be due to very small particle size and lower Sb-content in comparison to Sn. The pattern at 1.0 V (fully charged-state, Fig. S1d) shows only lines due to Sn-metal.
